# Supplementary material for: Effects of Phenolic Pollution on Interspecific Competition between Microcystis aeruginosa and Chlorella pyrenoidosa and their Photosynthetic Responses
Source: MDPI journal article supplement (doi:10.3390/ijerph16203947), 2019-10-17
Supplement: s1 [file s1]

## Effects of Phenolic Pollution on Interspecific Competition between *Microcystis aeruginosa* and *Chlorella pyrenoidosa* and their Photosynthetic Responses

### Supplementary Material

**Table S1.** Changes of the dissolved phenol concentration ( $\mu\text{g mL}^{-1}$ ).

|                                               | 0D            | 2D            | 4D            | 6D            | 8D            | 10D           | 12D           | 14D           | 16dD          | 18D           | 20D           | 22D           |
|-----------------------------------------------|---------------|---------------|---------------|---------------|---------------|---------------|---------------|---------------|---------------|---------------|---------------|---------------|
| <i>M. aeruginosa</i><br>mono-cultures         | 1.92 ± 0.02   | 1.88 ± 0.03   | 1.87 ± 0.02   | 1.85 ± 0.04   | 1.82 ± 0.06   | 1.78 ± 0.07   | 1.74 ± 0.09   | 1.71 ± 0.07   | 1.69 ± 0.06   | 1.66 ± 0.06   | 1.64 ± 0.07   | 1.63 ± 0.10   |
|                                               | 19.89 ± 0.03  | 19.75 ± 0.05  | 19.63 ± 0.05  | 19.48 ± 0.08  | 19.22 ± 0.08  | 18.83 ± 0.09  | 18.52 ± 0.10  | 18.27 ± 0.06  | 18.03 ± 0.11  | 17.82 ± 0.12  | 17.65 ± 0.14  | 17.53 ± 0.19  |
|                                               | 199.90 ± 0.05 | 199.59 ± 0.06 | 199.30 ± 0.08 | 198.93 ± 0.07 | 198.30 ± 0.16 | 197.36 ± 0.14 | 196.60 ± 0.18 | 195.97 ± 0.14 | 195.39 ± 0.12 | 194.89 ± 0.21 | 194.47 ± 0.30 | 194.04 ± 0.43 |
| <i>C. pyrenoidosa</i><br>mono-cultures        | 1.89 ± 0.03   | 1.83 ± 0.03   | 1.80 ± 0.07   | 1.77 ± 0.06   | 1.72 ± 0.07   | 1.65 ± 0.08   | 1.59 ± 0.09   | 1.54 ± 0.06   | 1.50 ± 0.08   | 1.46 ± 0.08   | 1.42 ± 0.10   | 1.39 ± 0.10   |
|                                               | 19.87 ± 0.03  | 19.58 ± 0.09  | 19.26 ± 0.04  | 18.19 ± 0.19  | 18.17 ± 0.12  | 17.15 ± 0.09  | 14.58 ± 0.10  | 13.60 ± 0.15  | 12.70 ± 0.10  | 11.92 ± 0.14  | 11.27 ± 0.15  | 10.53 ± 0.17  |
|                                               | 199.86 ± 0.06 | 198.70 ± 0.05 | 197.36 ± 0.06 | 194.26 ± 0.16 | 190.53 ± 0.15 | 188.38 ± 0.13 | 184.90 ± 0.08 | 176.73 ± 0.12 | 173.29 ± 0.18 | 170.31 ± 0.15 | 167.82 ± 0.12 | 165.58 ± 0.20 |
| Co-cultures                                   | 1.80 ± 0.03   | 1.69 ± 0.06   | 1.65 ± 0.03   | 1.61 ± 0.09   | 1.53 ± 0.08   | 1.42 ± 0.10   | 1.33 ± 0.07   | 1.26 ± 0.07   | 1.19 ± 0.08   | 1.13 ± 0.07   | 1.08 ± 0.08   | 1.06 ± 0.10   |
|                                               | 19.75 ± 0.05  | 19.23 ± 0.06  | 18.78 ± 0.06  | 18.85 ± 0.08  | 17.22 ± 0.13  | 15.75 ± 0.14  | 16.34 ± 0.10  | 15.66 ± 0.14  | 15.03 ± 0.18  | 14.49 ± 0.12  | 14.04 ± 0.06  | 13.45 ± 0.17  |
|                                               | 199.73 ± 0.06 | 198.21 ± 0.08 | 196.49 ± 0.07 | 195.62 ± 0.08 | 192.72 ± 0.10 | 184.93 ± 0.15 | 180.46 ± 0.10 | 182.00 ± 0.19 | 179.32 ± 0.23 | 177.01 ± 0.19 | 175.07 ± 0.39 | 173.28 ± 0.32 |
| Blank control<br>(with phenol, without algae) | 2.00 ± 0.00   | 1.99 ± 0.01   | 1.98 ± 0.01   | 1.97 ± 0.01   | 1.96 ± 0.02   | 1.96 ± 0.02   | 1.95 ± 0.02   | 1.93 ± 0.02   | 1.93 ± 0.02   | 1.92 ± 0.03   | 1.91 ± 0.03   | 1.90 ± 0.02   |
|                                               | 20.00 ± 0.00  | 19.99 ± 0.01  | 19.98 ± 0.02  | 19.97 ± 0.02  | 19.95 ± 0.02  | 19.95 ± 0.02  | 19.94 ± 0.02  | 19.92 ± 0.02  | 19.90 ± 0.02  | 19.89 ± 0.02  | 19.87 ± 0.02  | 19.85 ± 0.01  |
|                                               | 200.00 ± 0.00 | 199.98 ± 0.02 | 199.97 ± 0.03 | 199.96 ± 0.02 | 199.94 ± 0.03 | 199.93 ± 0.03 | 199.93 ± 0.02 | 199.93 ± 0.03 | 199.92 ± 0.03 | 199.91 ± 0.03 | 199.90 ± 0.03 | 199.88 ± 0.03 |
